# Supplementary material for: One-pot synthesis of chromenes in the presence of nano-cellulose/Ti(IV)/Fe3O4 as natural-based magnetic nano-catalysts under solvent free conditions
Source: Royal Society of Chemistry journal article supplement (doi:10.1039/d2ra05057a), 2022-01-01

## Supplementary

### One-pot synthesis of chromenes in the presence of nano-cellulose/Ti<sup>(IV)</sup>/Fe<sub>3</sub>O<sub>4</sub> as natural based magnetic nano-catalysts under solvent free condition

Raziyeh Gholami<sup>1</sup>, Abdolhamid Bamoniri\*<sup>1</sup>, Bi Bi Fatemeh Mirjalili,<sup>2</sup>

<sup>1</sup>Department of Organic Chemistry, Faculty of Chemistry, University of Kashan, Kashan, I.R. Iran.

\*Corresponding authors: Tel.: +98-31-55912384; E-mail: bamoniri@kashanu.ac.ir

<sup>2</sup>Department of Chemistry, Faculty of Science, Yazd University, I.R.Iran

#### Physical and spectral data

#### 2-amino-7,7-dimethyl-5-oxo-4-phenyl-5,6,7,8-tetrahydro-4H-chromene-3-carbonitrile

FT-IR [KBr  $\bar{\nu}$  (cm<sup>-1</sup>)]: 3395, 3324 (NH<sub>2</sub>), 3083, 3028 (C<sub>ArH</sub>), 2198 (C≡N), 1661 (C=O), 1602 (C=C), 1035 (C-O).

<sup>1</sup>H NMR (400 MHz, DMSO-d<sub>6</sub>)  $\delta$ ppm: 0.94 (s, 3H, CH<sub>3</sub>), 1.02 (s, 3H, CH<sub>3</sub>), 2.08 (m, 2H, CH<sub>2</sub>), 2.24 (m, 2H, CH<sub>2</sub>), 4.15 (s, 1H, CH), 6.97 (s, 2H, NH<sub>2</sub>), 7.14 (t, *J* = 7.12 Hz, 3H, Ar-H), 7.25-7.28 (m, 2H, Ar-H) .

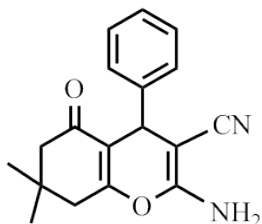

FT-IR

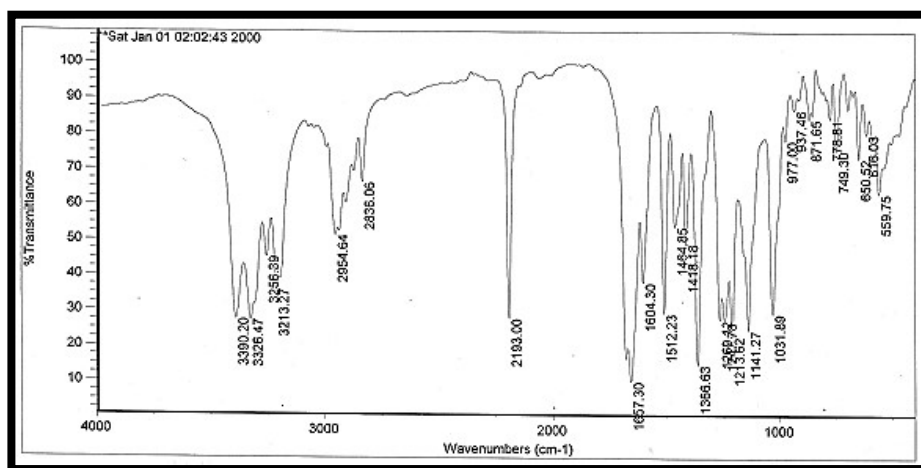

# <sup>1</sup>H NMR

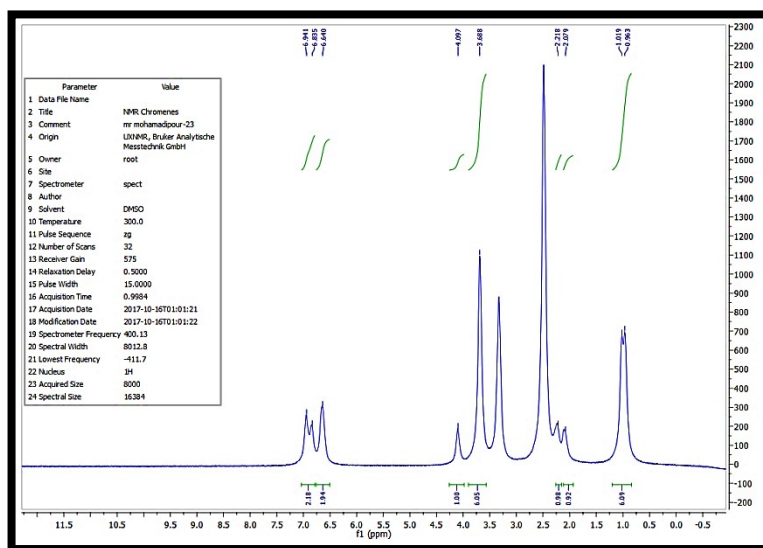

## 2-amino-4-(4-hydroxy-3-methoxyphenyl)-7,7-dimethyl-5-oxo-5,6,7,8-tetrahydro-4H-chromene-3-carbonitrile

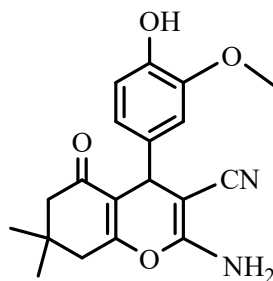

**FT-IR [KBr  $\bar{\nu}$  (cm<sup>-1</sup>):** 3497 (O-H), 3403, 3324 (NH<sub>2</sub>), 3016 (Ar-H), 2192 (C≡N), 1654 (C=O), 1603 (C=C), 1034 (C-O).

**<sup>1</sup>H NMR (400 MHz, DMSO-d<sub>6</sub>)  $\delta$ ppm:** 0.95 (s, 3H, CH<sub>3</sub>), 1.02 (s, 3H, CH<sub>3</sub>), 2.08 (m, 2H, CH<sub>2</sub>), 2.23 (m, 2H, CH<sub>2</sub>), 3.69 (s, 3H, OCH<sub>3</sub>), 4.05 (s, 1H, CH), 6.48-6.51 (m, 1H), 6.62-6.66 (m, 2H), 6.89 (s, 2H, NH<sub>2</sub>), 8.80 (s, 1H, OH).

# FT-IR

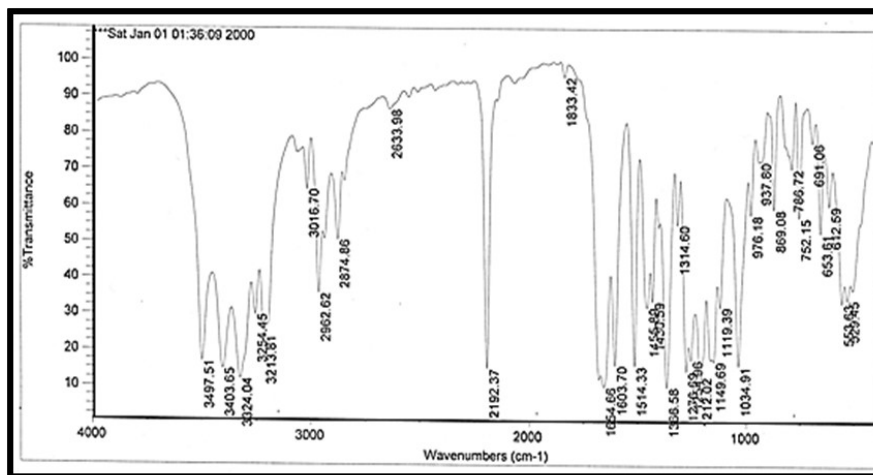

# <sup>1</sup>H NMR

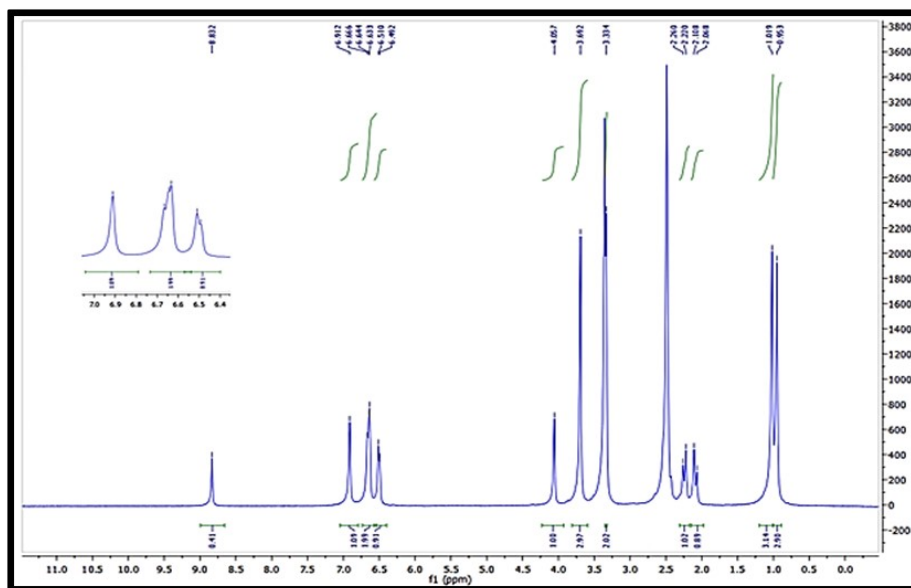

**2-amino-4-(4-chlorophenyl)-7,7-dimethyl-5-oxo-5,6,7,8-tetrahydro-4H  
chromene-3-carbonitrile**

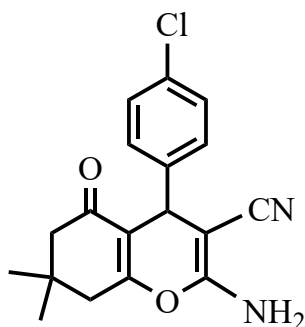

**FT-IR [KBr  $\bar{\nu}$  (cm<sup>-1</sup>):** 3380, 3323 (NH<sub>2</sub>), 3183, 2959 (Ar-H), 2188 (C≡N), 1676 (C=O), 1603 (C=C), 1032 (C-O).

**<sup>1</sup>H NMR (400 MHz, DMSO-d<sub>6</sub>)  $\delta$ ppm:** 0.92 (s, 3H, CH<sub>3</sub>), 1.01 (s, 3H, CH<sub>3</sub>), 2.08 (m, 2H, CH<sub>2</sub>), 2.22 (m, 2H, CH<sub>2</sub>), 4.17 (s, 1H, CH), 7.03 (s, 2H, NH<sub>2</sub>), 7.15 (d, *J* = 8.44 Hz, 2H), 7.32 (d, *J* = 8.4 Hz, 1H).

**FT-IR**

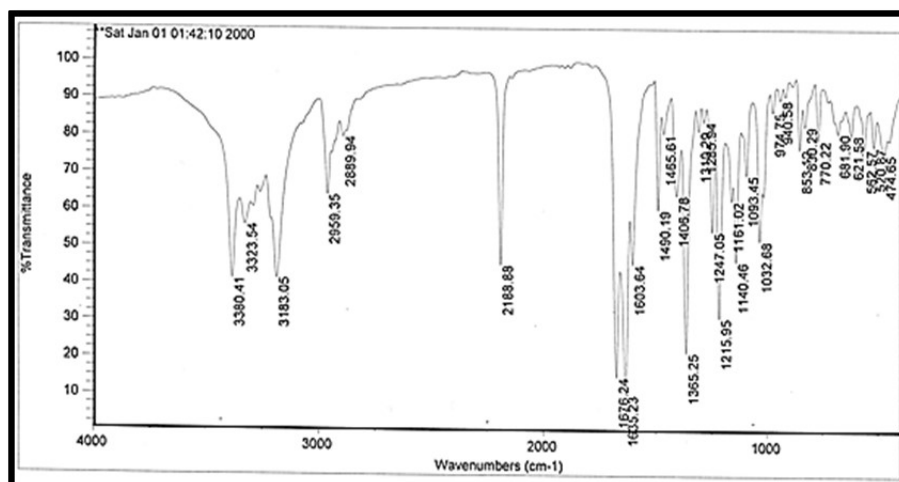

## $^1\text{H}$ NMR

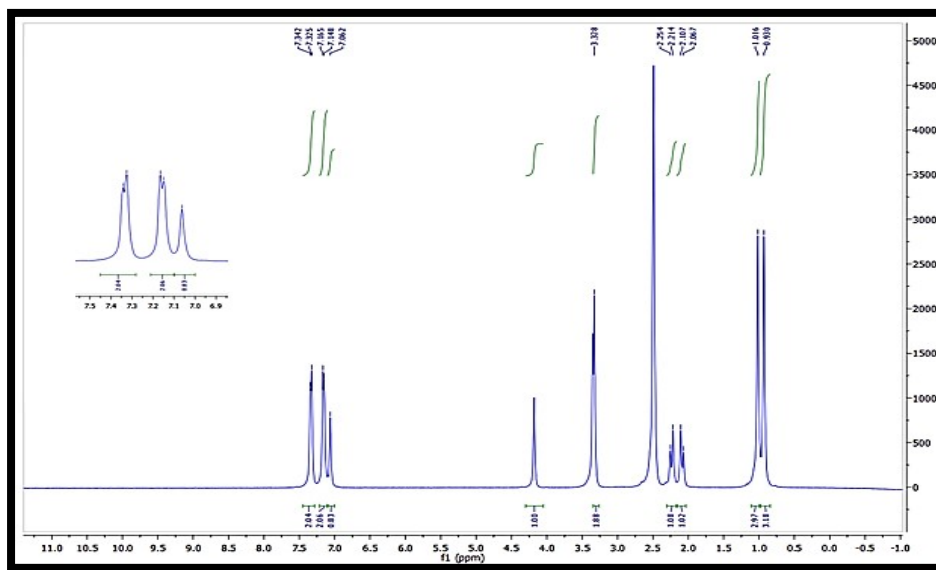

### 2-amino-4-(2,4-dimethoxyphenyl)-7,7-dimethyl-5-oxo-5,6,7,8-tetrahydro-4H-chromene-3-carbonitrile

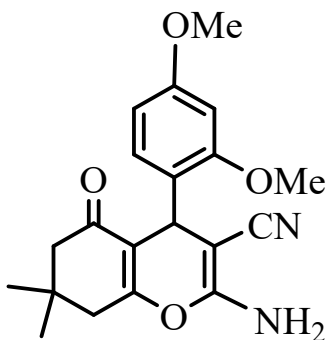

**FT-IR [KBr  $\bar{\nu}$  ( $\text{cm}^{-1}$ )]:** 3390, 3326 ( $\text{NH}_2$ ), 3256, 3213, 2954 (Ar-H), 2193 ( $\text{C}\equiv\text{N}$ ), 1657 ( $\text{C}=\text{O}$ ), 1604 ( $\text{C}=\text{C}$ ), 1031 ( $\text{C}-\text{O}$ ).

**$^1\text{H}$  NMR (400 MHz,  $\text{DMSO}-d_6$ )  $\delta$ ppm:** 0.96 (3H, s,  $\text{CH}_3$ ), 1.01 (3H, s,  $\text{CH}_3$ ), 2.07 (m, 2H,  $\text{CH}_2$ ), 2.21 (m, 2H,  $\text{CH}_2$ ), 3.68 (6H, s,  $\text{OCH}_3$ ), 4.09 (1H, s, CH), 6.83 (4H, br s, H-Ar,  $\text{NH}_2$ ).

# FT-IR

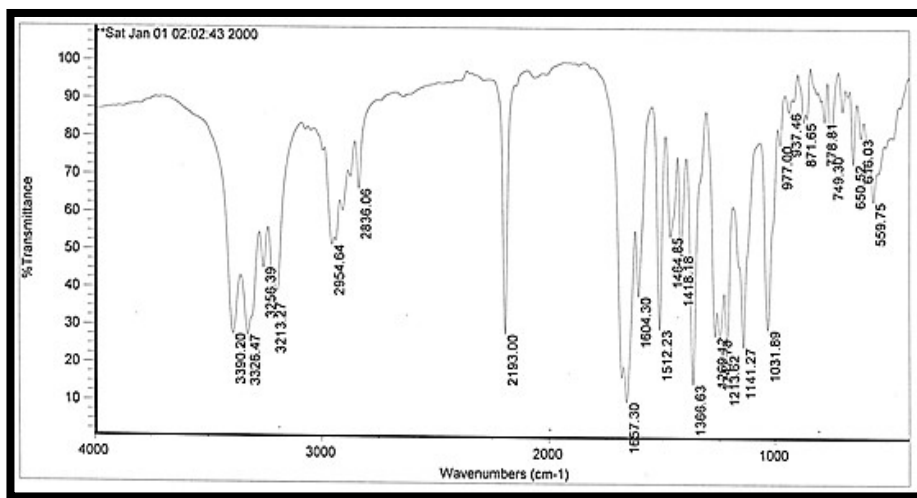

# <sup>1</sup>H NMR

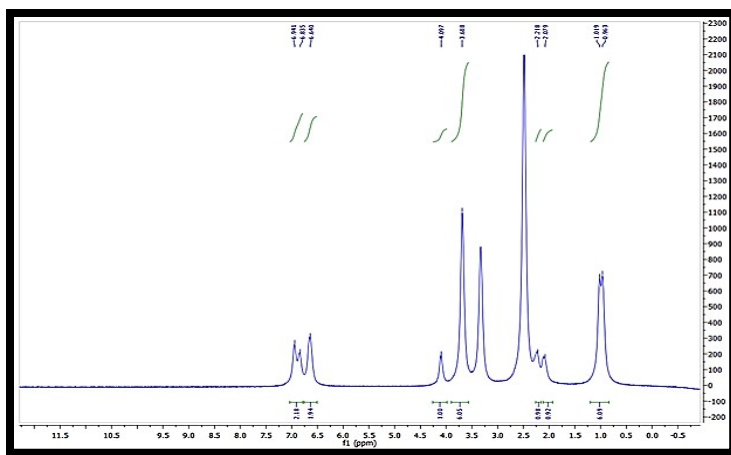

**2-amino-7,7-dimethyl-4-(2-nitrophenyl)-5-oxo-5,6,7,8-tetrahydro-4H-chromene-3-carbonitrile**

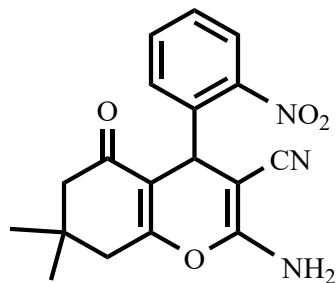

**FT-IR [KBr  $\bar{\nu}$  (cm<sup>-1</sup>):** 3471, 3332 (NH<sub>2</sub>), 3255, 3210, 2960 (Ar-H), 2194 (C≡N), 1688 (C=O), 1602 (C=C), 1525, 1596 (NO<sub>2</sub>), 1041 (C-O).

**<sup>1</sup>H NMR (400 MHz, DMSO-d<sub>6</sub>)  $\delta$ ppm:** 0.81 (s, 3H, CH<sub>3</sub>), 0.94 (s, 3H, CH<sub>3</sub>), 1.94 (m, 2H, CH<sub>2</sub>), 2.13 (m, 2H, CH<sub>2</sub>), 4.86 (s, 1H), 7.11 (s, 2H, NH<sub>2</sub>), 7.28 (dd, *J* = 6.78, 1.00 Hz, 1H), 7.36 (t, *J* = 7.2 Hz, 1H), 7.57-7.75 (m, 2H).

**FT-IR**

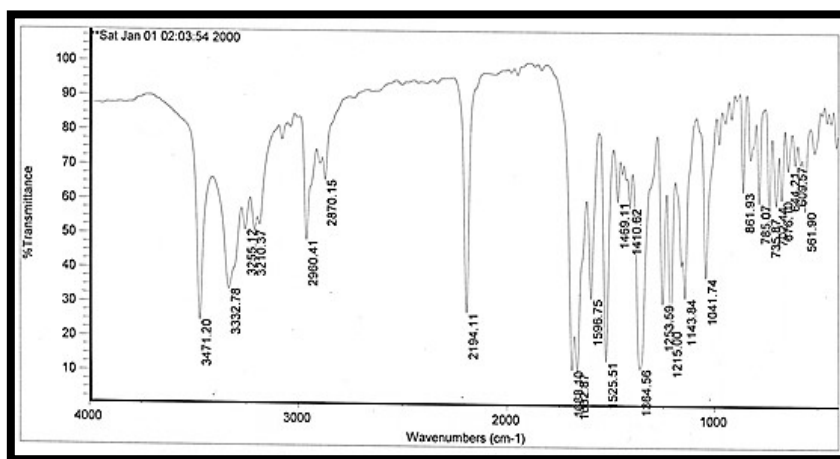

## $^1\text{H}$ NMR

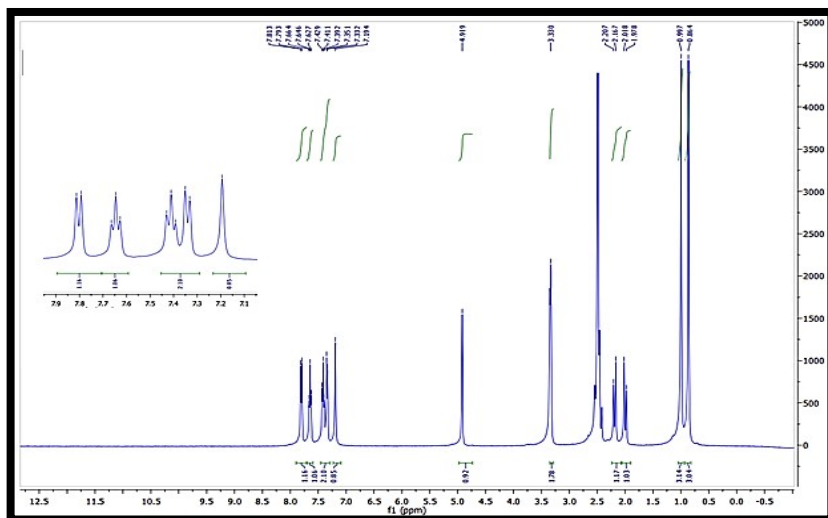

### 2-amino-4-(2-methoxyphenyl)-7,7-dimethyl-5-oxo-5,6,7,8-tetrahydro-4H-chromene-3-carbonitrile

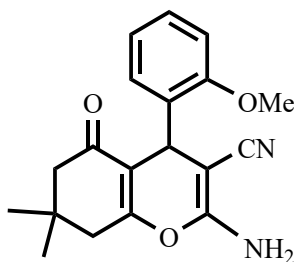

**FT-IR [KBr  $\bar{\nu}$  ( $\text{cm}^{-1}$ )]:** 3396, 3329 ( $\text{NH}_2$ ), 3262, 3219, 2964 (Ar-H), 2189 ( $\text{C}\equiv\text{N}$ ), 1685 ( $\text{C}=\text{O}$ ), 1654 ( $\text{C}=\text{C}$ ), 1036 ( $\text{C}-\text{O}$ ).

**$^1\text{H}$  NMR (400 MHz,  $\text{DMSO}-d_6$ )  $\delta$ ppm:** 0.95 (3H, s,  $\text{CH}_3$ ), 1.02 (3H, s,  $\text{CH}_3$ ), 2.14 (m, 2H,  $\text{CH}_2$ ), 3.73 (3H, s,  $\text{OCH}_3$ ), 4.45 (1H, s, CH), 6.82 (2H, br s,  $\text{NH}_2$ ), 6.96 (2H, br s, H-Ar), 7.14 (1H, br s, H-Ar).



## FT-IR

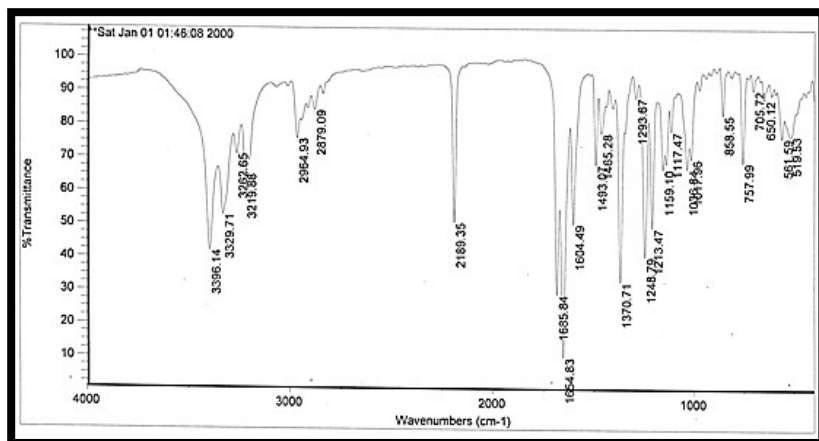

## <sup>1</sup>H NMR

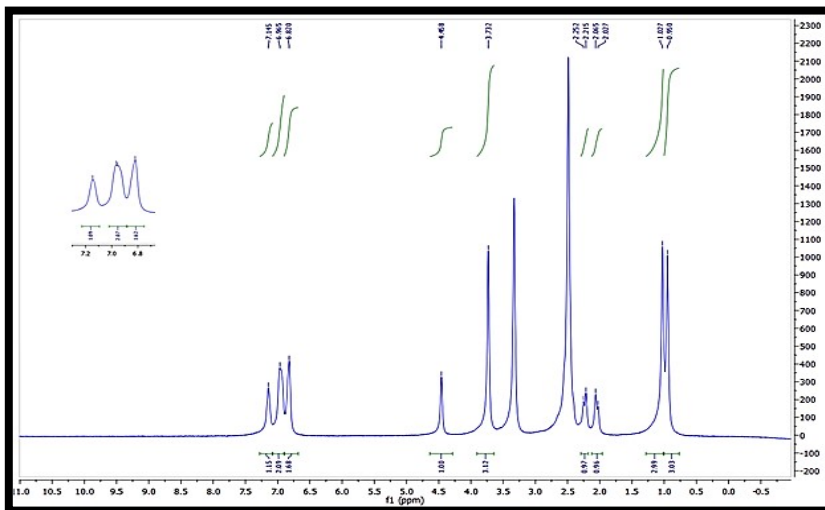

**4,4'-(1,4-phenylene)bis(2-amino-7,7-dimethyl-5-oxo-5,6,7,8-tetrahydro-4H-chromene-3 carbonitrile)**

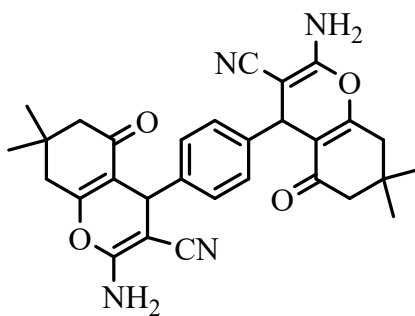

**FT-IR [KBr  $\bar{\nu}$  (cm<sup>-1</sup>)]:** 3392, 3325 (NH<sub>2</sub>), 3254, 3211, 2963 (Ar-H), 2194 (C≡N), 1686 (C=O), 1649 (C=C), 1041 (C-O).

**<sup>1</sup>H NMR (400 MHz, DMSO-d<sub>6</sub>)  $\delta$ ppm:** 0.93 (3H, s, CH<sub>3</sub>), 1.02 (3H, s, CH<sub>3</sub>), 2.15 (m, 2H, CH<sub>2</sub>), 4.24 (1H, s, CH), 7.08 (2H, br s, NH<sub>2</sub>), 7.25 (2H, d, *J* = 8, H-Ar), 7.85 (2H, d, *J* = 8, H-Ar).

## FT-IR

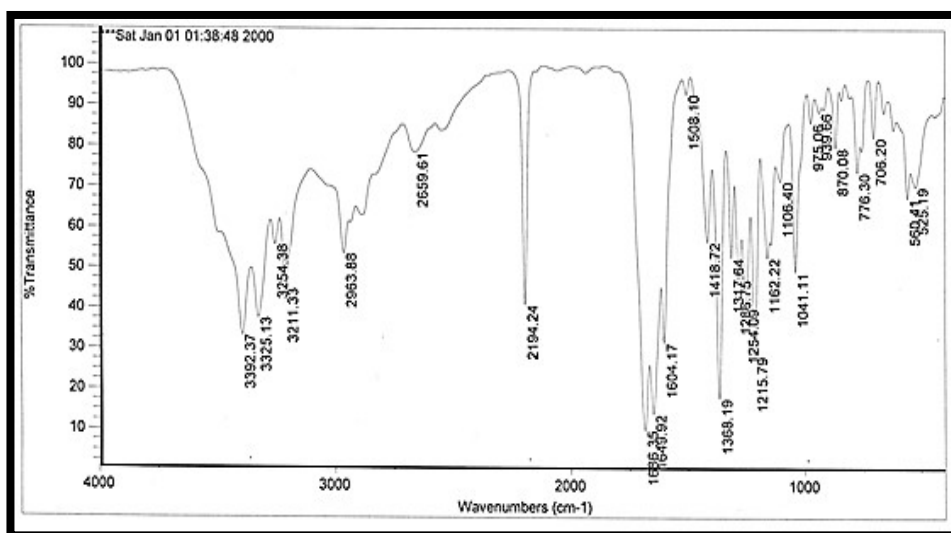

## <sup>1</sup>H NMR

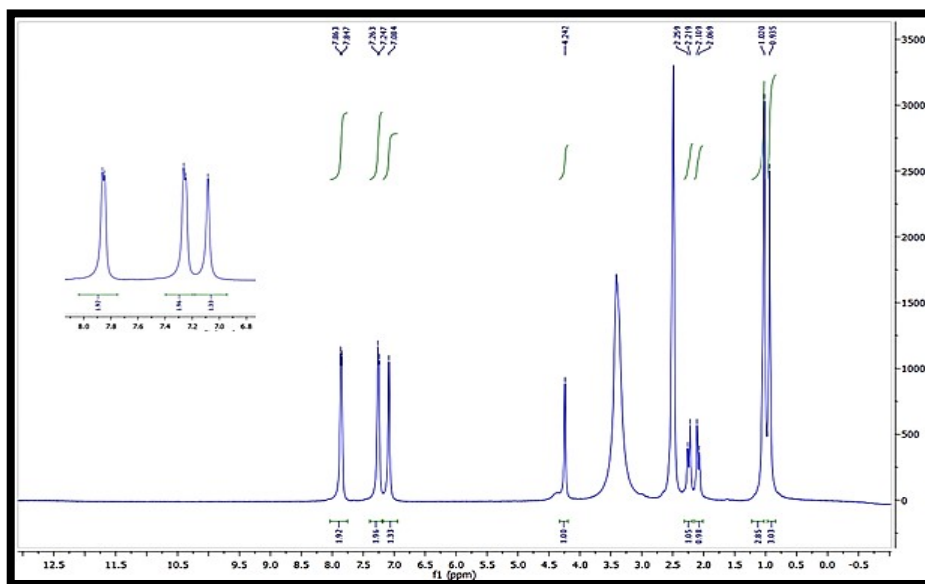

**2-amino-5-oxo-4-(m-tolyl)-4,5-dihydropyrano[3,2-c]chromene-3-carbonitrile**

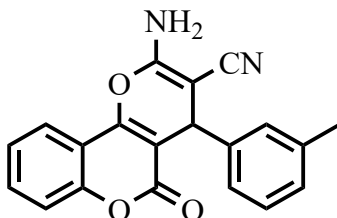

**FT-IR [KBr  $\bar{\nu}$  ( $\text{cm}^{-1}$ )]:** 3390, 3321 ( $\text{NH}_2$ ), 3050, 3015 (Ar-H), 2198 ( $\text{C}\equiv\text{N}$ ), 1705, 1674 ( $\text{C}=\text{O}$ ), 1603 ( $\text{C}=\text{C}$ ), 1060 ( $\text{C}-\text{O}$ ).

**$^1\text{H}$  NMR (400 MHz,  $\text{DMSO}-d_6$ )  $\delta$ ppm:** 2.24 (3H, s,  $\text{CH}_3$ ), 4.42 (1H, s, CH), 7.03 (3H, br s,  $\text{NH}_2$ ), 7.183 (1H, t,  $J = 8$ , H-Ar), 7.379 (1H, s, H-Ar), 7.445 (1H, d,  $J = 11$ , H-Ar), 7.49 (1H, d,  $J = 9.5$ , H-Ar), 7.69 (1H, t,  $J = 9.5$ , H-Ar), 7.89 (1H, d,  $J = 9.5$ , H-Ar).

# FT-IR

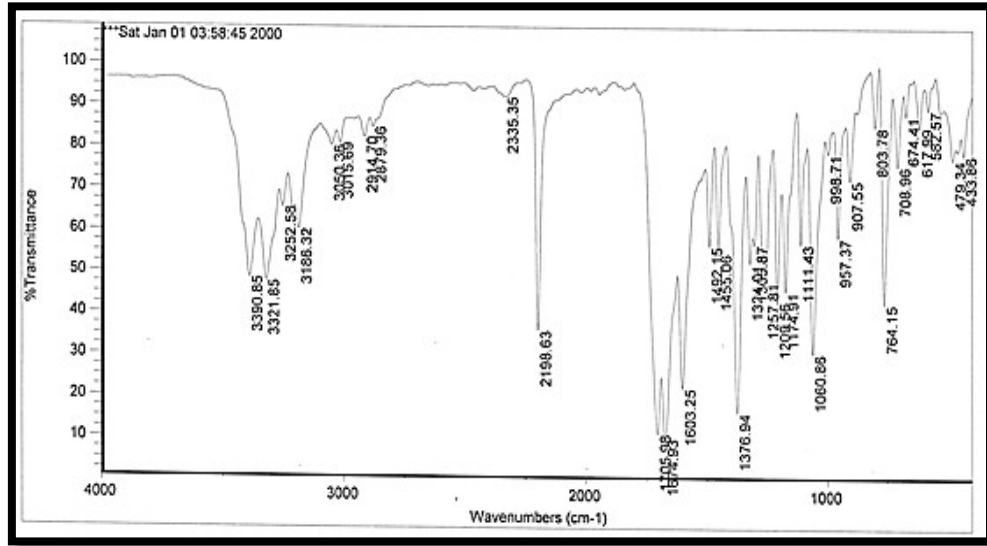

# <sup>1</sup>H NMR

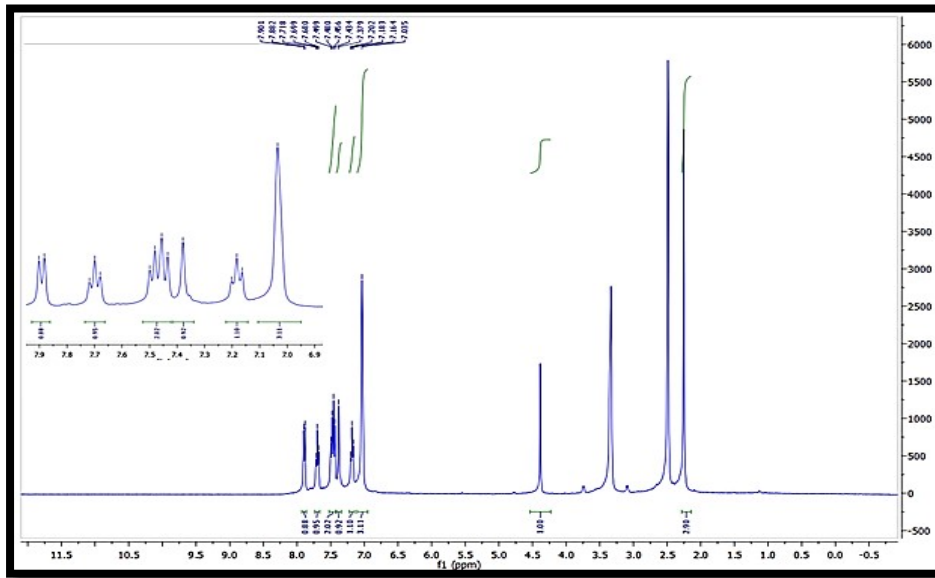

**2-amino-5-oxo-4-(2-chlorophenyl)-4,5-dihydropyrano[3,2-c]  
carbonitrile**

**chromene-3**

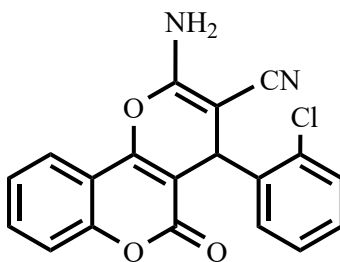

**FT-IR [KBr  $\bar{\nu}$  (cm<sup>-1</sup>)]:** 3398, 3284 (NH<sub>2</sub>), 3179 (Ar-H), 2199 (C≡N), 1708, 1673 (C=O), 1603 (C=C), 1060 (C-O).

**<sup>1</sup>H NMR (400 MHz, DMSO-d<sub>6</sub>)  $\delta$ ppm:** 4.96 (1H, s, CH), 7.28 (3H, m, NH<sub>2</sub>, H-Ar), 7.47 (4H, m, H-Ar), 7.71 (1H, t, *J*= 9.5, H-Ar), 7.89 (1H, d, *J*= 9.5, H-Ar).

**FT-IR**

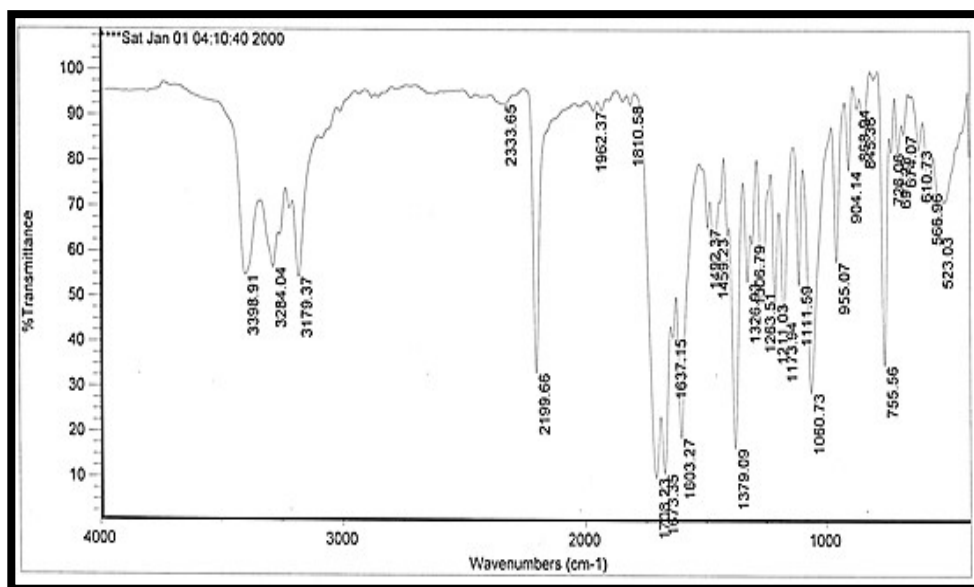

## <sup>1</sup>H NMR

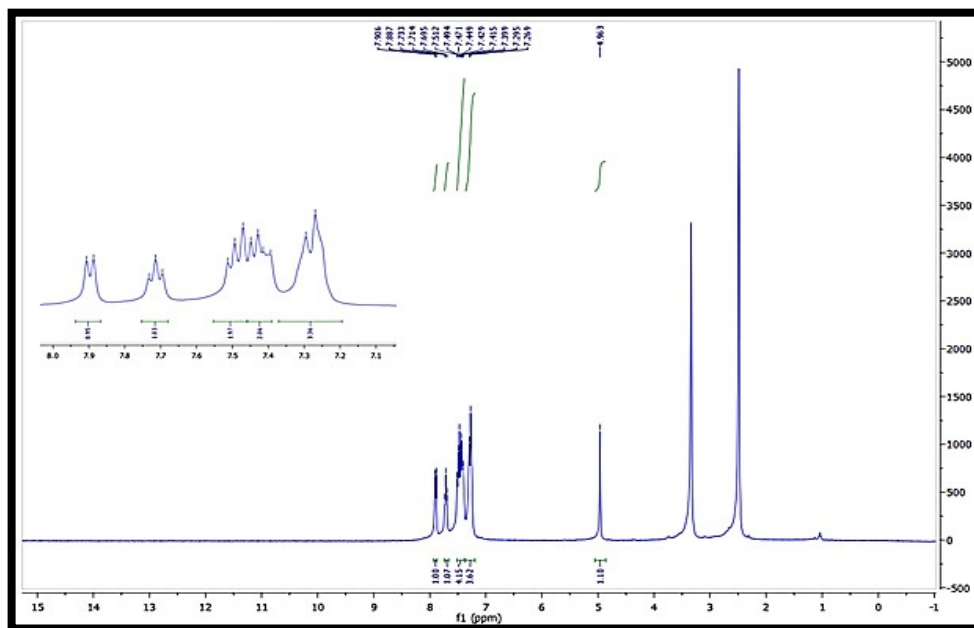

## 2-amino-5-oxo-4-phenyl-4,5-dihydroprano[3,2-c]chromene-3-carbonitrile

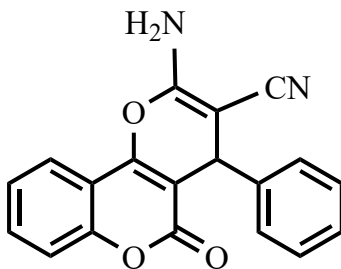

**FT-IR [KBr  $\bar{\nu}$  (cm<sup>-1</sup>):** 3377, 3285 (NH<sub>2</sub>), 3180, 2887 (Ar-H), 2196 (C≡N), 1709, 1673 (C=O), 1605 (C=C), 1056 (C-O).

**<sup>1</sup>H NMR (400 MHz, DMSO-d<sub>6</sub>)  $\delta$ ppm:** 4.43 (1H, s, CH), 7.24-7.47 (9H, m, NH<sub>2</sub>, H-Ar), 7.69 (1H, br s, H-Ar), 7.88 (1H, d,  $J$ = 6.5, H-Ar).

## FT-IR

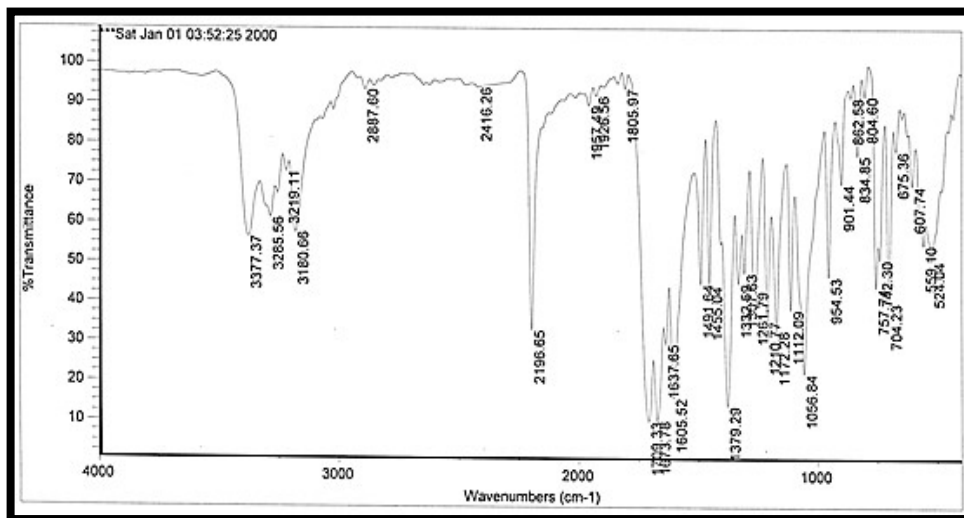

## <sup>1</sup>H NMR

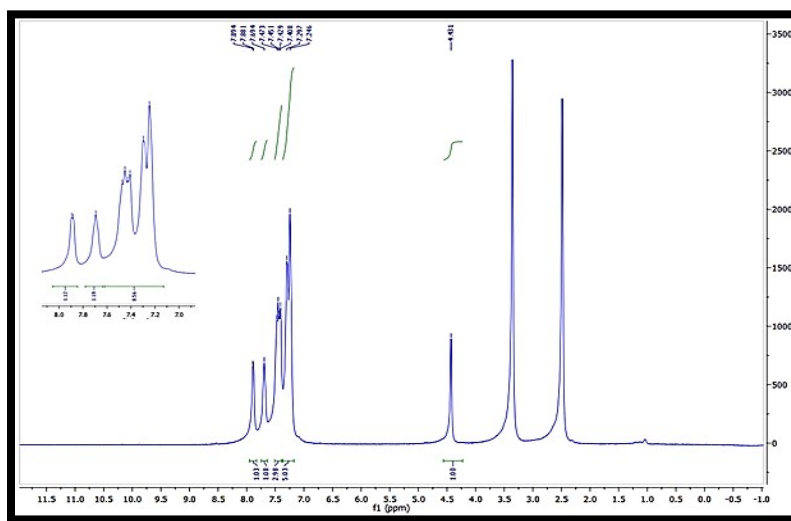

2-amino-5-oxo-4-(4-nitrophenyl)-4,5-dihydropyrano[3,2-*c*]

chromene-3-

carbonitrile

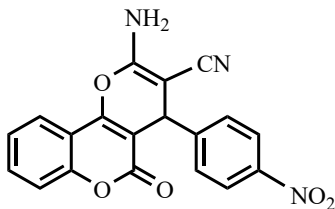

**FT-IR [KBr  $\bar{\nu}$  (cm<sup>-1</sup>)]:** 3335-3479 (NH<sub>2</sub>), 3191, 3069 (Ar-H), 2195 (C≡N), 1718, 1672 (C=O), 1602 (C=C), 1505, 1456 (NO<sub>2</sub>), 1054 (C-O).

**<sup>1</sup>H NMR (400 MHz, DMSO-d<sub>6</sub>)  $\delta$ ppm:** 4.66 (1H, s, CH), 7.45-7.59 (4H, m, NH<sub>2</sub>, H-Ar), 7.72 (1H, t, *J*= 10, H-Ar), 7.90 (1H, d, *J*= 10, H-Ar), 8.16 (1H, d, *J*= 10.5, H-Ar).

### FT-IR

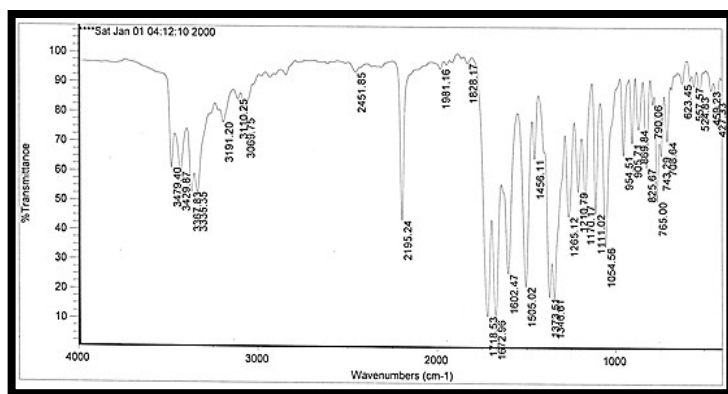

### <sup>1</sup>H NMR

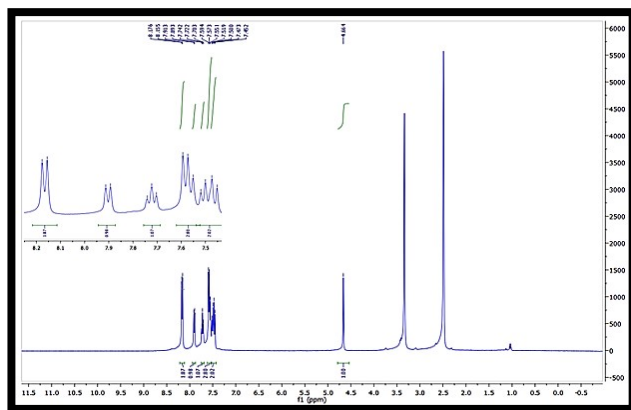



**2-amino-4-(4-methoxyphenyl)-5-oxo-4,5-dihydropyrano[3,2-c] chromene-3-carbonitrile**

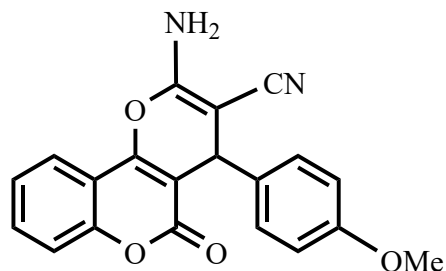

**FT-IR [KBr  $\bar{\nu}$  (cm<sup>-1</sup>):** 3383, 3319 (NH<sub>2</sub>), 3252, 3190, 3064, 2954 (Ar-H), 2202 (C≡N), 1709, 1672 (C=O), 1606 (C=C), 1052 (C-O).

**<sup>1</sup>H NMR (400 MHz, DMSO-d<sub>6</sub>)  $\delta$ ppm:** 3.70 (3H, s, OCH<sub>3</sub>), 4.38 (1H, s, CH), 6.85 (2H, d, *J* = 11, H-Ar), 7.15 (2H, d, *J* = 11, H-Ar), 7.36 (2H, br s, NH<sub>2</sub>), 7.43 (1H, d, *J* = 10.5, H-Ar), 7.48 (1H, d, *J* = 9.5, H-Ar), 7.69 (1H, t, *J* = 9.5, H-Ar), 7.88 (1H, d, *J* = 10, H-Ar).

**FT-IR**

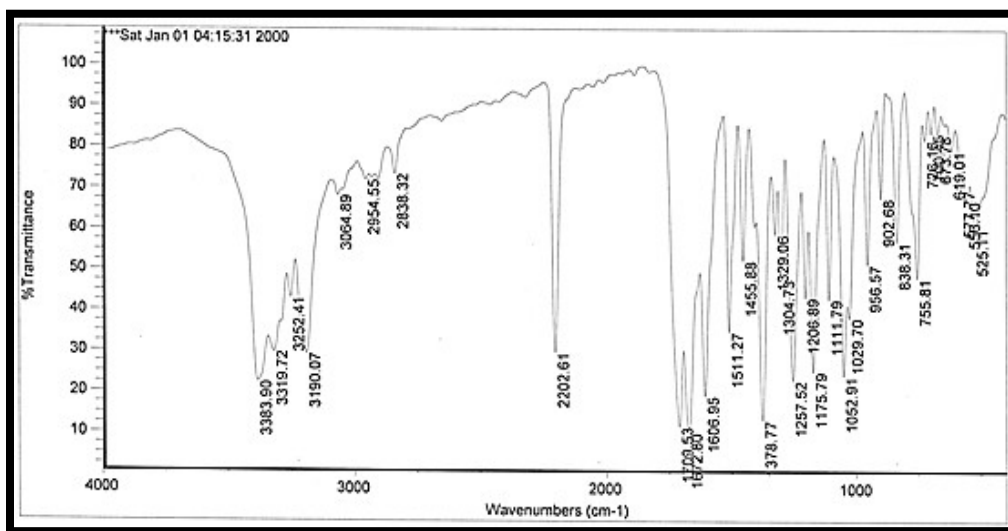

## $^1\text{H}$ NMR

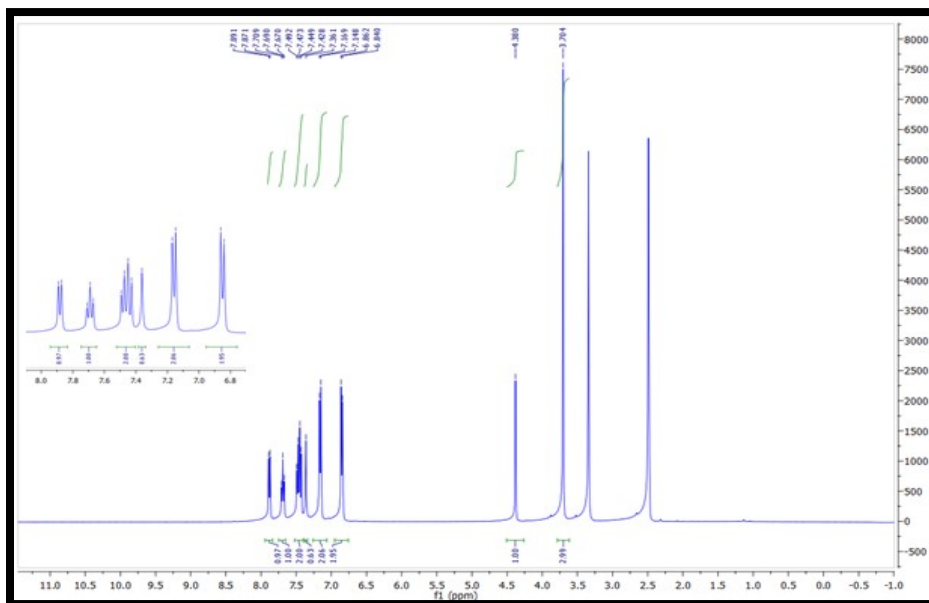

### 4,4'-(1,4-phenylene)bis(2-amino-5-oxo-4,5-dihydropyrano[3,2-c] chromene-3-carbonitrile)

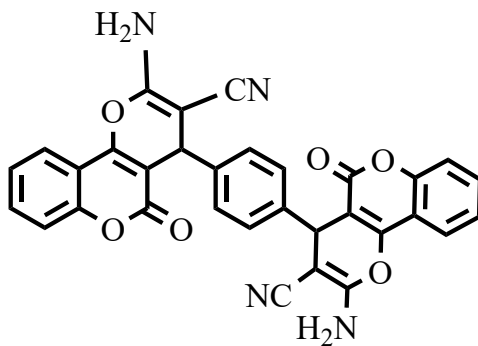

**FT-IR [KBr  $\bar{\nu}$  (cm<sup>-1</sup>):** 3324 (NH<sub>2</sub>), 3191 (Ar-H), 2196 (C≡N), 1709, 1672 (C=O), 1604 (C=C), 1055 (C-O).

**$^1\text{H}$  NMR (400 MHz, DMSO-*d*<sub>6</sub>)  $\delta$ ppm:** 4.40 (1H, s, CH), 7.26 (4H, br s, NH<sub>2</sub>), 7.31 (3H, d, *J* = 6.0 Hz, H-Ar), 7.42 (3H, br s, H-Ar), 7.47 (2H, d, *J* = 10.8 Hz, H-Ar), 7.90 (2H, d, *J* = 6.8 Hz, H-Ar), 7.70 (2H, br s, H-Ar).

# FT-IR

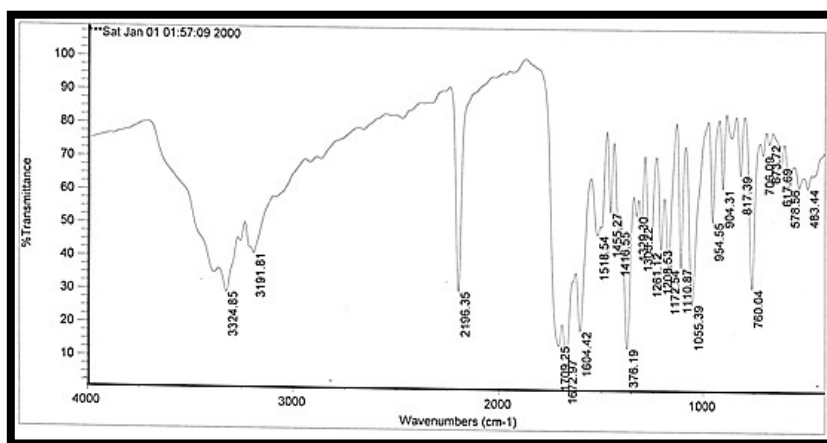

# <sup>1</sup>H NMR

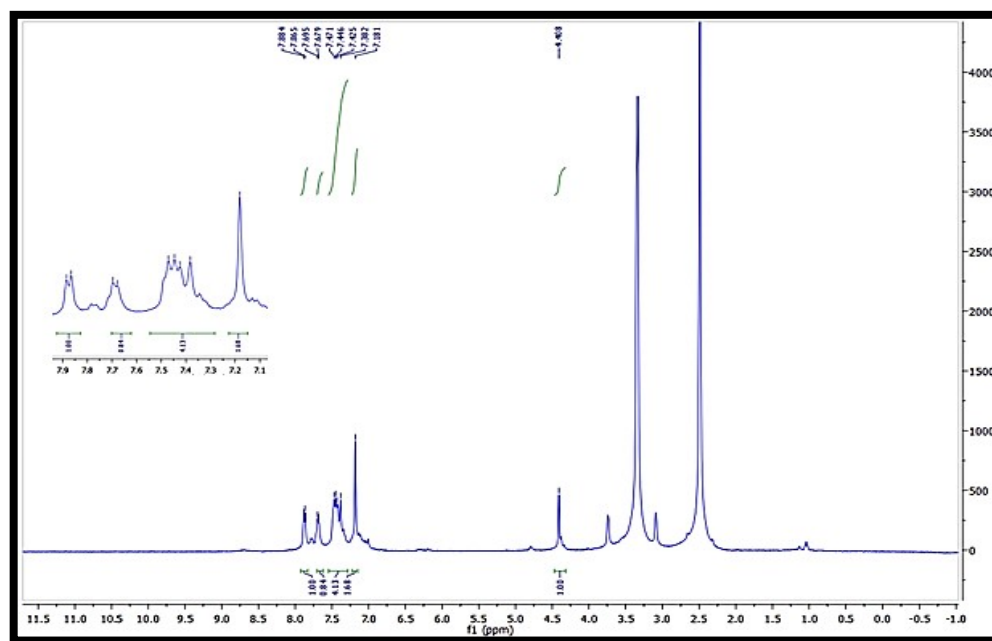

## 2-amino-4-(4-hydroxy-3-methoxyphenyl)-7-methyl-5-oxo-4,5 dihydropyrano[4,3-*b*]pyran-3-carbonitrile

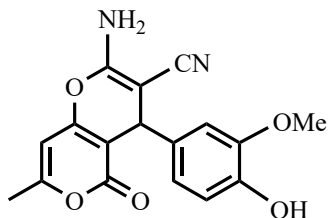

**FT-IR [KBr  $\bar{\nu}$  (cm<sup>-1</sup>):** 3492 (OH), 3349, 3094 (NH<sub>2</sub>), 3094 (Ar-H), 2200 (C≡N), 1702, 1673 (C=O), 1639, 1607 (C=C), 1034 (C-O).

**<sup>1</sup>H NMR (400 MHz, DMSO-d<sub>6</sub>)  $\delta$ ppm:** 2.22 (3H, s, CH<sub>3</sub>), 3.74 (3H, s, OCH<sub>3</sub>), 4.16 (1H, s, CH), 6.24 (1H, s, H-pyran), 6.51 (1H, d, *J* = 9, H-Ar), 6.68 (1H, d, *J* = 10.5, H-Ar), 6.72 (1H, s, H-Ar), 7.12 (2H, br s, NH<sub>2</sub>), 8.92 (1H, br s, OH).

### FT-IR

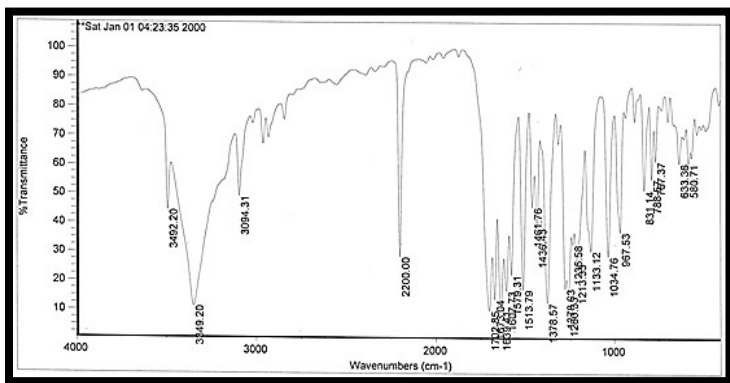

### <sup>1</sup>H NMR

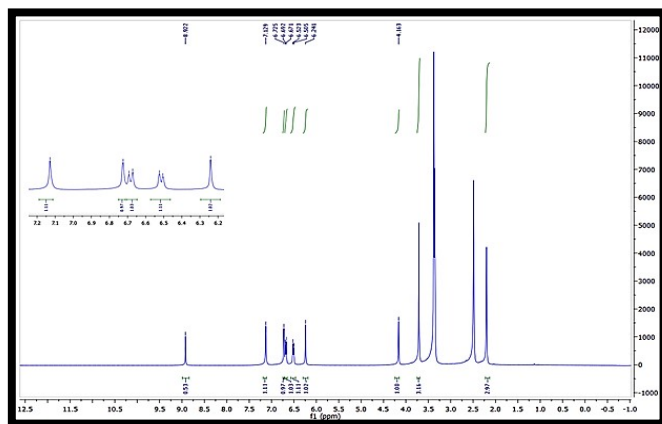

**2-amino-7-methyl-4-(3-nitrophenyl)-5-oxo-4,5-dihydropyrano[4,3-b]pyran-3-carbonitrile**

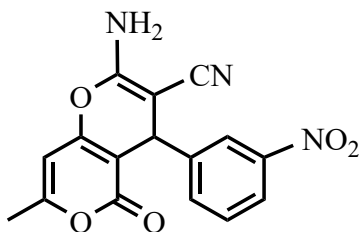

**FT-IR [KBr  $\bar{\nu}$  (cm<sup>-1</sup>):** 3457, 3360 (NH<sub>2</sub>), 3237, 3184, 3118, 3076 (Ar-H), 2874, 2195 (C≡N), 1705, 1670 (C=O), 1639, 1609 (C=C), 1473, 1526 (NO<sub>2</sub>), 1038 (C-O).

**<sup>1</sup>H NMR (400 MHz, DMSO-d<sub>6</sub>)  $\delta$ ppm:** 2.21 (3H, s, CH<sub>3</sub>), 4.54 (1H, s, CH), 6.30 (1H, s, H-pyran), 7.35 (1H, s, H-Ar), 8.03 (2H, s, NH<sub>2</sub>), 8.11 (1H, d,  $J=10$ , H-Ar).

**FT-IR**

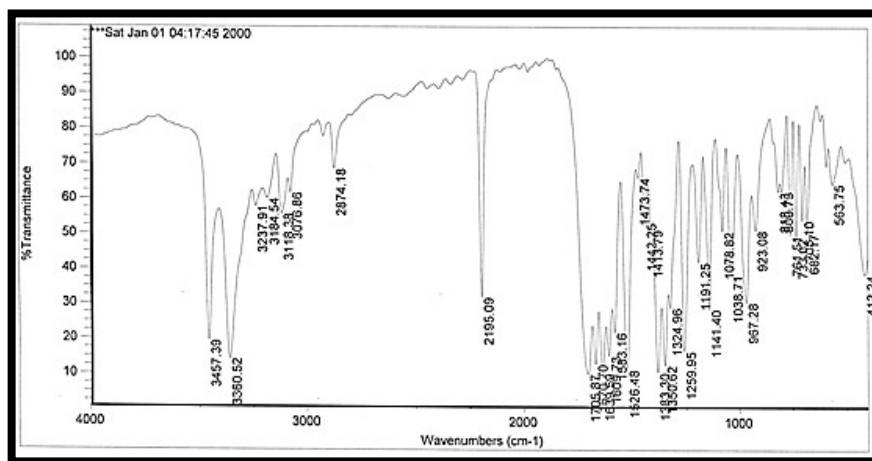

## <sup>1</sup>H NMR

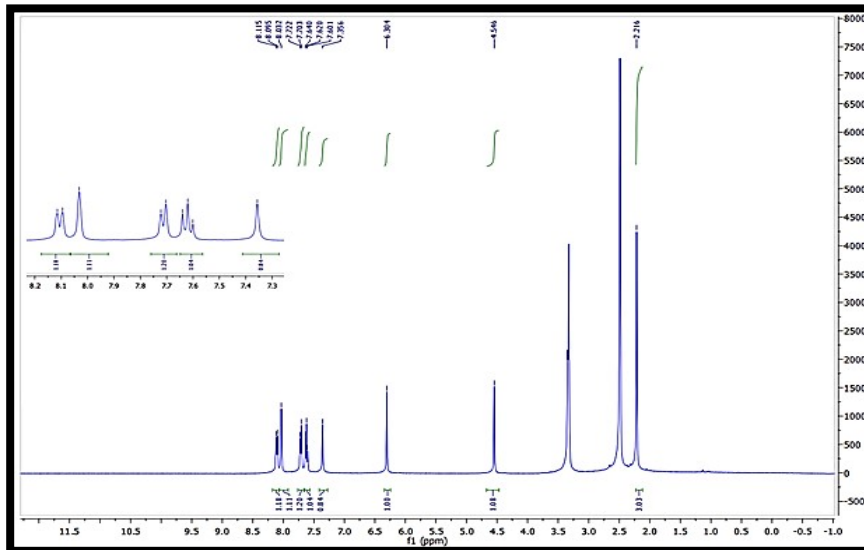

### 2-amino-4-(4-ethoxyphenyl)-7-methyl-5-oxo-4,5-dihydropyrano[4,3-*b*]pyran-3-carbonitrile

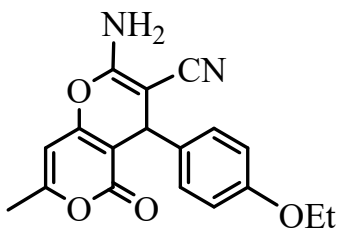

**FT-IR [KBr  $\bar{\nu}$  (cm<sup>-1</sup>):** 3450, 3401 (NH<sub>2</sub>), 3209 (C-H), 3101, 2980 (Ar-H), 2929, 2883, 2195 (C≡N), 1702, 1671 (C=O), 1643, 1610 (C=C), 1042 (C-O).

**<sup>1</sup>H NMR (400 MHz, DMSO-d<sub>6</sub>)  $\delta$ ppm:** 1.28 (3H, t,  $J = 8$ , CH<sub>3</sub>), 2.19 (3H, s, CH<sub>3</sub>), 3.96 (2H, q,  $J = 7.5$ , CH<sub>2</sub>), 4.19 (1H, s, CH), 6.24 (1H, s, H-pyran), 6.82 (2H, d,  $J = 10$ , H-Ar), 7.06 (2H, d,  $J = 10$ , H-Ar), 7.14 (2H, br s, NH<sub>2</sub>).

## FT-IR

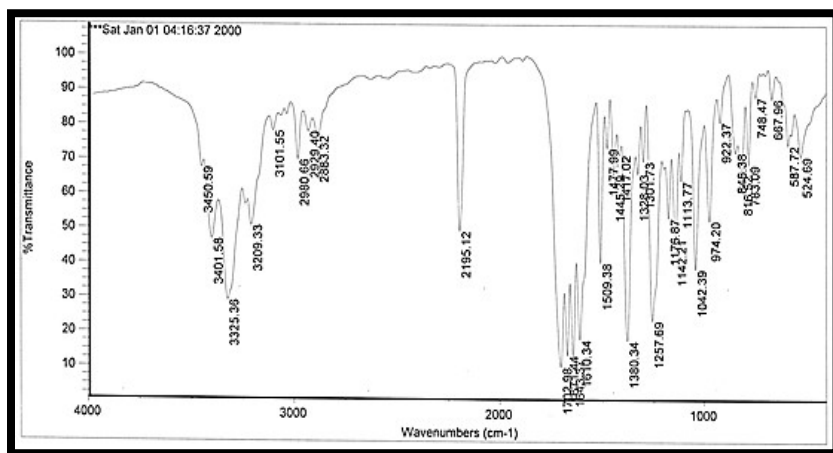

## <sup>1</sup>H NMR

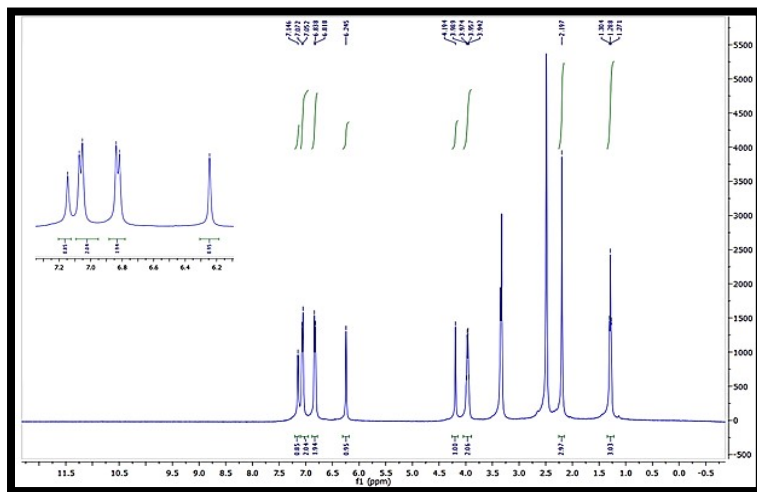

4,4'-(1,4-phenylene)bis(2-amino-7-methyl-5-oxo-4,5-dihydropyranob)pyran-3-carbonitrile

[4,3-

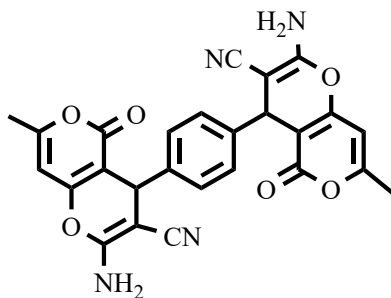

**FT-IR [KBr  $\bar{\nu}$  ( $\text{cm}^{-1}$ )]:** 3457, 3323 ( $\text{NH}_2$ ), 3196 (Ar-H), 2891 (aliphatic C-H), 2195 ( $\text{C}\equiv\text{N}$ ), 1704, 1677 ( $\text{C}=\text{O}$ ), 1643, 1610 ( $\text{C}=\text{C}$ ), 1039 ( $\text{C}-\text{O}$ ).

**$^1\text{H}$  NMR (400 MHz,  $\text{DMSO}-d_6$ )  $\delta$ ppm:** 2.19 (3H, s,  $\text{CH}_3$ ), 4.22 (1H, s, CH), 6.25 (1H, s, H-pyran), 7.09 (2H, s,  $\text{NH}_2$ ), 7.18 (4H, s, H-Ar).

## FT-IR

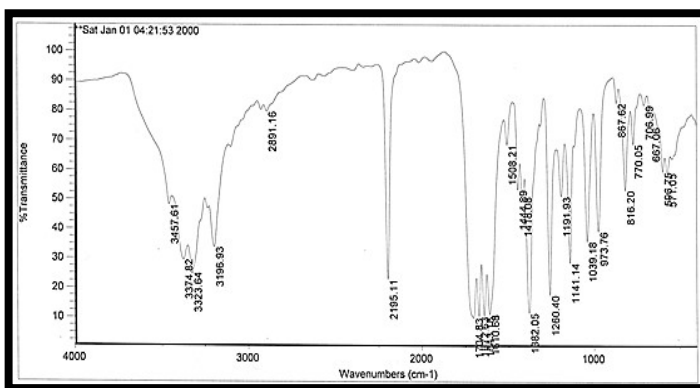

## $^1\text{H}$ NMR

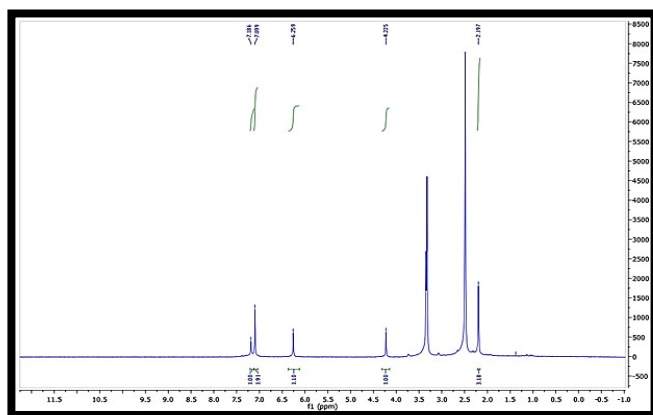



### 3-amino-1-(3-nitrophenyl)-1H-benzo[f]chromene-2-carbonitrile

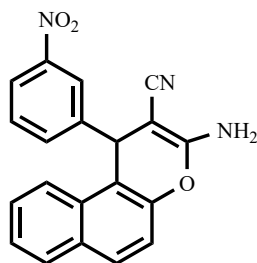

**FT-IR [KBr  $\bar{\nu}$  (cm<sup>-1</sup>):** 3404, 3356 (NH<sub>2</sub>), 3196, 2891 (Ar-H), 2190 (C≡N), 1658 (C=O), 1643, 1610 (C=C), 1527, 1349 (NO<sub>2</sub>), 1083 (C-O).

**<sup>1</sup>H NMR (400 MHz, DMSO-d<sub>6</sub>)  $\delta$ ppm:** 5.40 (1H, s, CH), 7.20 (2H, s, NH<sub>2</sub>), 7.42 (2H, d, *J* = 9.01 Hz, Ar-H), 7.51–7.57 (2H, m, Ar-H), 7.63 (1H, d, *J* = 7.74 Hz, Ar-H), 7.78 (1H, d, *J* = 9.11 Hz, Ar-H), 7.93 (1H, d, *J* = 9.06 Hz, Ar-H), 8.01 (1H, d, *J* = 8.01 Hz, Ar-H), 8.06 (1H, s, Ar-H), 8.05 (1H, d, *J* = 1.75 Hz, Ar-H).

### FT-IR

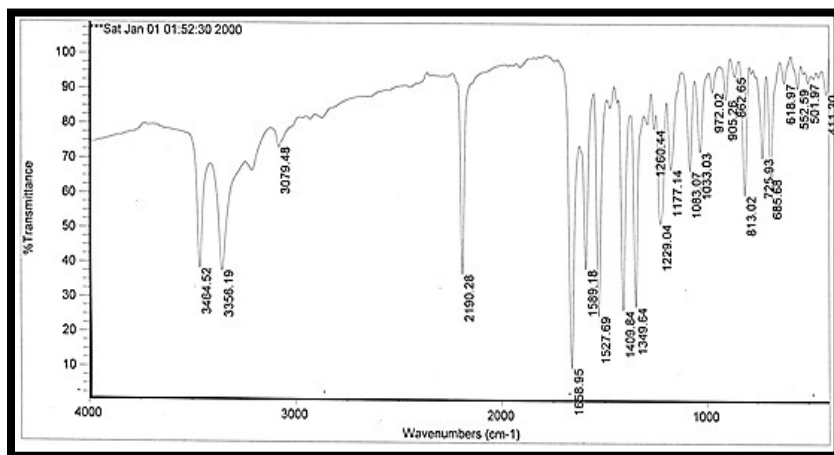

## <sup>1</sup>H NMR

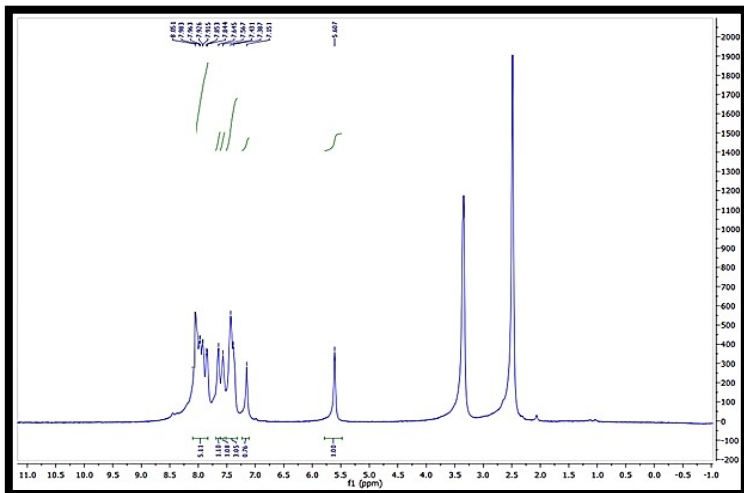

### 3-amino-1-(p-tolyl)-1*H*-benzo[*f*]chromene-2-carbonitrile

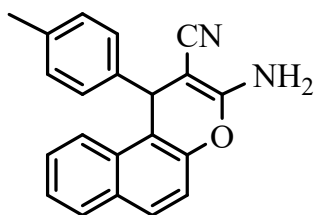

**FT-IR [KBr  $\bar{\nu}$  (cm<sup>-1</sup>):** 3404, 3356 (NH<sub>2</sub>), 3079 (Ar-H), 2190 (C≡N), 1658, 1615 (C=C), 1035 (C-O).

**<sup>1</sup>H NMR (400 MHz, DMSO-d<sub>6</sub>)  $\delta$ ppm:** 2.17 (3H, s, CH<sub>3</sub>), 5.22 (1H, s, CH), 6.25 (1H, s, CH), 6.94 (1H, br s, H-Ar), 7.04 (4H, br s, H-Ar), 7.30-7.40 (8H, m, H-Ar, NH<sub>2</sub>), 7.80-7.89 (3H, m, H-Ar).

# FT-IR

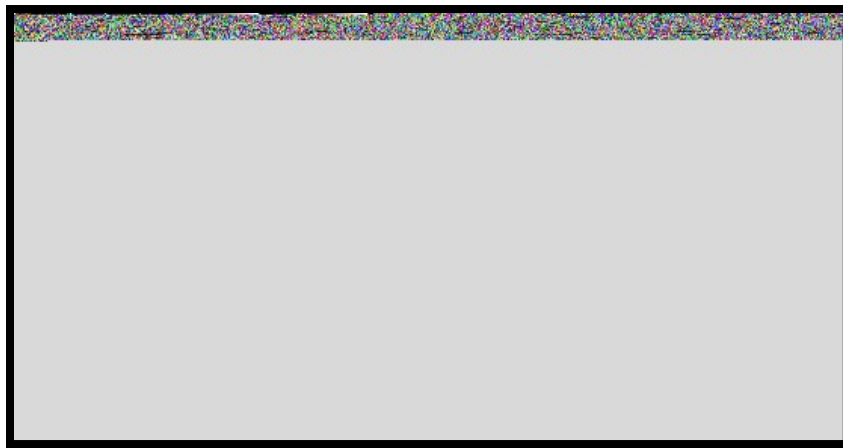

# <sup>1</sup>H NMR

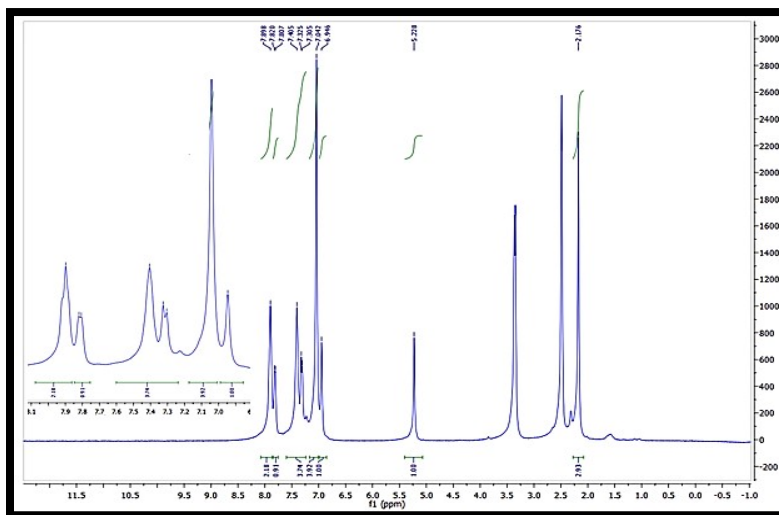

### 3-amino-1-(2,4-dichlorophenyl)-1H-benzo[f]chromene-2-carbonitrile

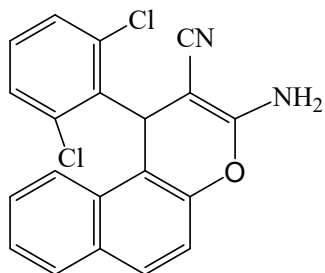

**FT-IR [KBr  $\bar{\nu}$  ( $\text{cm}^{-1}$ )]:** 34093, 3356 ( $\text{NH}_2$ ), 2156 ( $\text{C}\equiv\text{N}$ ), 1684, 1450 ( $\text{C}=\text{C}$ ), 1254( $\text{C}-\text{O}$ ).

**$^1\text{H}$  NMR (400 MHz,  $\text{DMSO}-d_6$ )  $\delta$ ppm:** 5.20 (1H, s, CH), 7.00-8.00 (11H, m, H-Ar,  $\text{NH}_2$ ).

### FT-IR

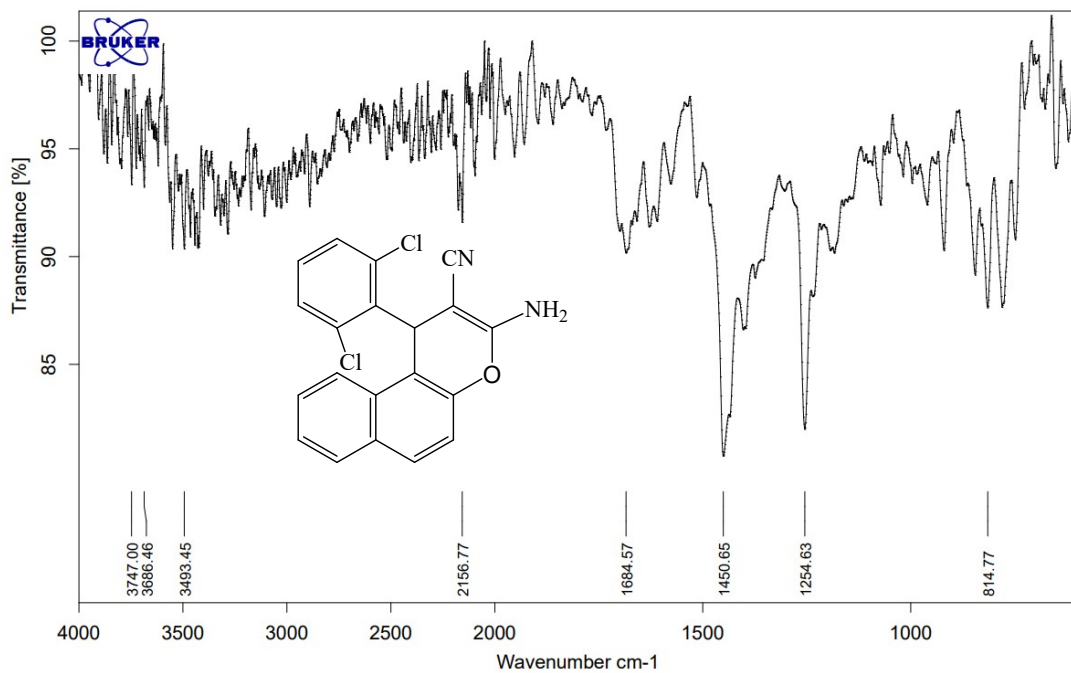

# $^1\text{H}$ NMR

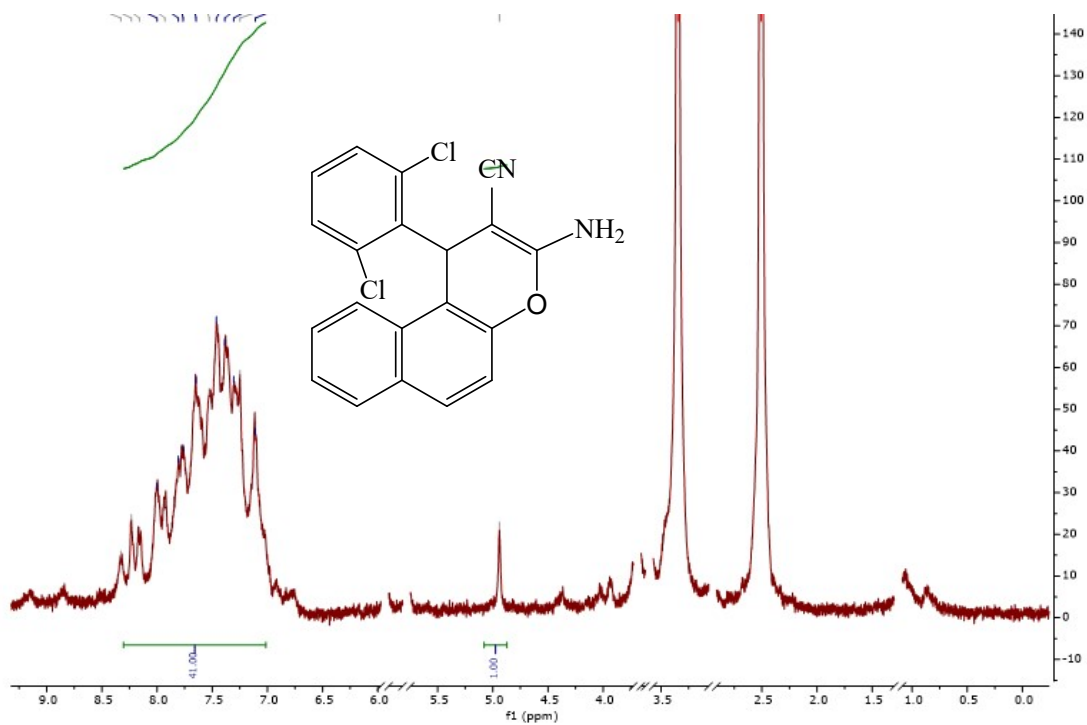

Supplement: d2ra05057a1.pdf [file d2ra05057a1.pdf]
